# Supplementary material for: Structures and photocatalytic properties of two new Zn(ii) coordination polymers based on semi-rigid V-shaped multicarboxylate ligands
Source: Royal Society of Chemistry journal article supplement (doi:10.1039/d0ra02222e), 2020-01-01
Supplement: d0ra02222e1.pdf [file d0ra02222e1.pdf]

## Supporting Information

### Structures and photocatalytic properties of two new Zn(II) coordination polymers based on semi-rigid V-shaped multicarboxylate ligand

Shan-He Zhou<sup>a</sup>, Jun Wang<sup>a\*</sup>, Yi-Wei Liu<sup>b</sup>, Yuyu Zhong<sup>b</sup>, Yan-Chun Sun<sup>a</sup>, Bin Xie<sup>a</sup>,  
Aiqing Ma<sup>b\*</sup>, Amita Singh,<sup>c</sup> Mohd. Muddassir,<sup>d</sup> Abhinav Kumar<sup>c\*</sup>

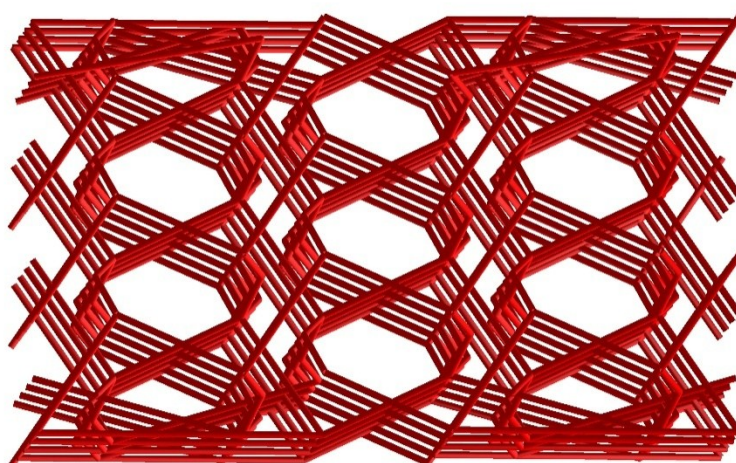

Fig. S1 Topological representation (view along the a axis) of the 4-connected 3D net

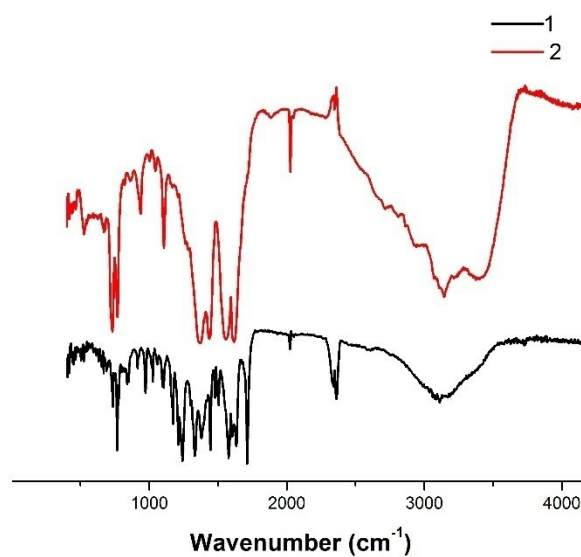

Fig. S2 view of the IR.

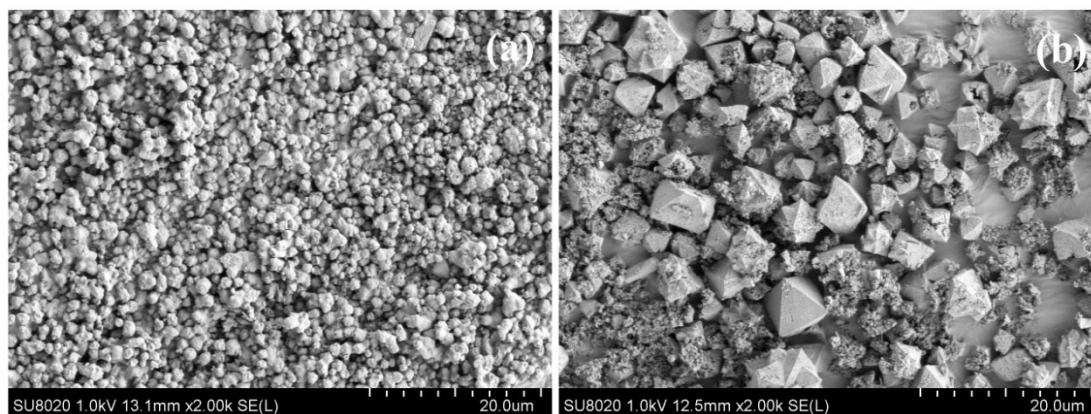

Fig. S3 SEM image of title CP s. The magnifications of picture were 100 thousand.

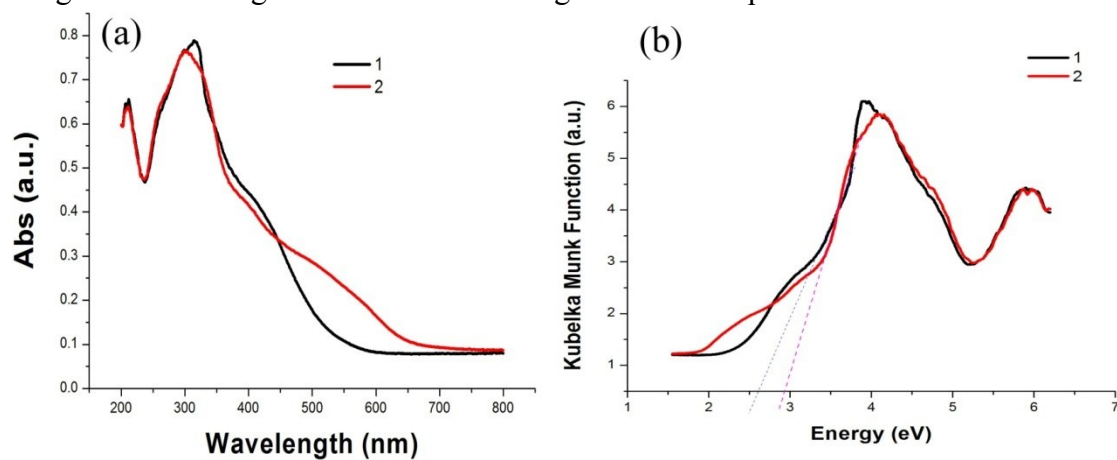

Fig.S4 (a)The UV-visible absorption spectrum of **1** and **2** and (b) Solid-state optical diffuse-reflection spectra of **1** and **2** derived from diffuse reflectance data at ambient temperature.

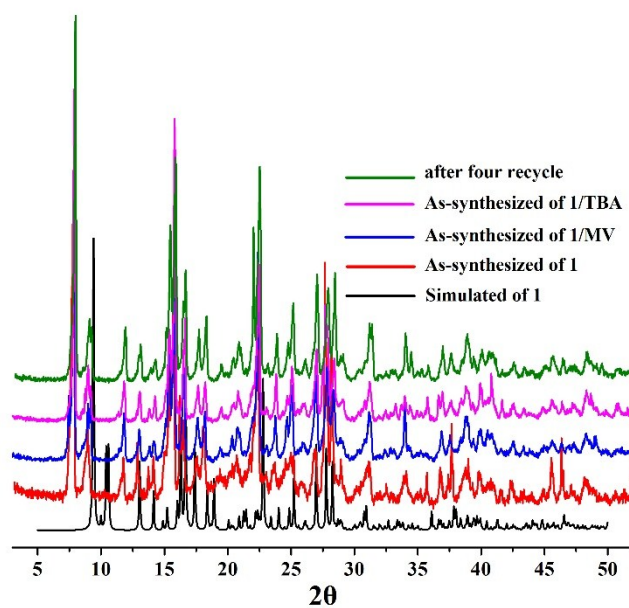

Fig. S5 view of the PXR D patterns of **1** under the different conditions.

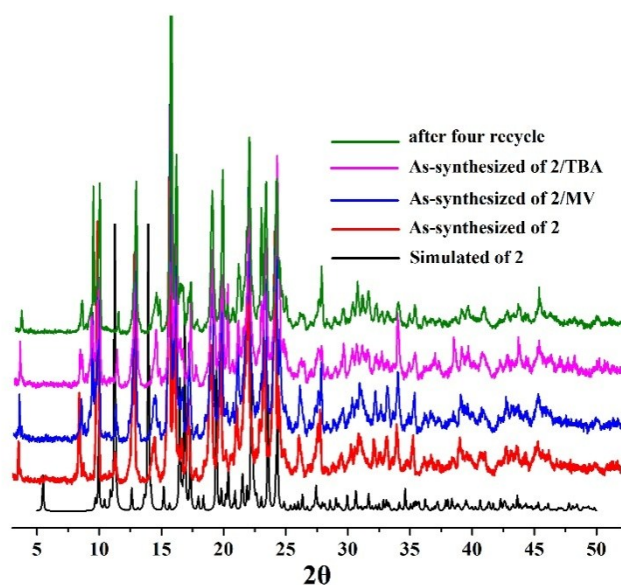

Fig. S6 view of the PXRD patterns of **2** under the different conditions.

**Table 1. Crystallographic data and structure refinement details for CPs 1-2**

| Parameter                                 | <b>1</b>    | <b>2</b>             |
|-------------------------------------------|-------------|----------------------|
| Formula weight                            | 539.80      | 1263.07              |
| Crystal system                            | Triclinic   | Monoclinic           |
| Space group                               | <i>P</i> -1 | <i>C</i> 2/ <i>c</i> |
| Crystal Color                             | Colorless   | Colorless            |
| <i>a</i> , Å                              | 9.9215(14)  | 32.621(5)            |
| <i>b</i> , Å                              | 11.0863(16) | 9.236(4)             |
| <i>c</i> , Å                              | 12.2729(17) | 18.455(5)            |
| $\alpha$ , °                              | 111.943(2)  | 90                   |
| $\beta$ , °                               | 102.760(2)  | 98.21(2)             |
| $\gamma$ , °                              | 106.552(2)  | 90                   |
| <i>V</i> , Å <sup>3</sup>                 | 1116.0(3)   | 5503(3)              |
| <i>Z</i>                                  | 2           | 4                    |
| $\rho_{\text{calcd}}$ , g/cm <sup>3</sup> | 1.606       | 1.525                |
| $\mu$ , mm <sup>-1</sup>                  | 1.157       | 2.150                |
| <i>F</i> (000)                            | 552         | 2568                 |

|                                              |                |                |
|----------------------------------------------|----------------|----------------|
| $\theta$ Range, deg                          | 2.4-27.7       | 4.8-66.0       |
| Reflection Collected                         | 5246           | 4727           |
| Independent reflections ( $R_{\text{int}}$ ) | 0.016          | 0.043          |
| Reflections with $I > 2\sigma(I)$            | 4233           | 3321           |
| Number of parameters                         | 332            | 409            |
| $R_1, wR_2(I > 2\sigma(I))^*$                | 0.0326, 0.0824 | 0.0993, 0.2785 |
| $R_1, wR_2$ (all data)**                     | 0.0417, 0.0866 | 0.1236, 0.3126 |

\*  $R = \sum(F_o - F_c) / \sum(F_o)$ , \*\*  $wR_2 = \{\sum[w(F_o^2 - F_c^2)^2] / \sum(F_o^2)^2\}^{1/2}$ .

**Table 2.** Selected bond distances (Å) and angles (deg) for **1-2**

| 1                  |            |                    |            |
|--------------------|------------|--------------------|------------|
| Zn(1)-O(1)         | 2.0287(18) | Zn(1)-O(8)         | 2.0951(16) |
| Zn(1)-N(1)         | 2.1134(18) | Zn(1)-N(2)         | 2.109(2)   |
| Zn(1)-O(3)#1       | 2.0757(18) |                    |            |
| 2                  |            |                    |            |
| Zn-O(6)            | 2.229(10)  | Zn-N(3)            | 2.013(12)  |
| Zn-O(6)#1          | 2.061(11)  | Zn-O(7)#1          | 2.121(7)   |
| Zn(01)-O(1)        | 1.909(9)   | Zn(01)-N(1)        | 2.015(6)   |
| Zn(01)-N(2)        | 2.086(8)   | Zn(01)-O(4)#2      | 1.955(6)   |
| 1                  |            |                    |            |
| O(1)-Zn(1)-O(8)    | 89.83(7)   | O(1)-Zn(1)-N(1)    | 93.20(7)   |
| O(1)-Zn(1)-N(2)    | 132.16(7)  | O(1)-Zn(1)-O(3)#1  | 127.92(7)  |
| O(8)-Zn(1)-N(1)    | 165.01(8)  | O(8)-Zn(1)-N(2)    | 89.53(7)   |
| O(3)#1-Zn(1)-O(8)  | 94.21(7)   | N(1)-Zn(1)-N(2)    | 77.57(8)   |
| O(3)#1-Zn(1)-N(1)  | 95.49(7)   | O(3)#1-Zn(1)-N(2)  | 99.82(7)   |
| 2                  |            |                    |            |
| O(6)-Zn-N(3)       | 123.9(4)   | O(6)-Zn-O(6)#1     | 86.8(4)    |
| O(1)-Zn-O(7)#1     | 136.6(6)   | O(6)#1-Zn-N(3)     | 91.3(5)    |
| O(7)#1-Zn-N(3)     | 88.6(5)    | O(6)#1-Zn-O(7)#1   | 62.3(5)    |
| O(1)-Zn(01)-N(1)   | 139.6(3)   | O(1)-Zn(01)-N(2)   | 101.7(3)   |
| O(1)-Zn(01)-O(4)#2 | 106.0(3)   | N(1)-Zn(01)-N(2)   | 100.3(3)   |
| O(4)#2-Zn(01)-N(1) | 106.3(2)   | O(4)#2-Zn(01)-N(2) | 93.0(3)    |

Symmetry Cddes: **For 1:** #1 = 1+x, y, z. **For 2:** #1 = 1-x, y, 3/2 -z; #2 = x, 1-y, -1/2+z.
